# Supplementary material
Source: PubMed Central journal article supplement (PMC2762347)
Supplement: NIHMS140488-supplement-2_si_002.pdf [file NIHMS140488-supplement-2_si_002.pdf]

# Pattern-Based Recognition for the Rapid Determination of Identity, Concentration, and Enantiomeric Excess of Subtly Different Threo Diols

*Shagufta H. Shabbir; Leo A. Joyce; Gabriella M. da Cruz; Vincent M. Lynch; Steven Sorey;*

*Eric V. Anslyn\**

Department of Chemistry and Biochemistry, The University of Texas at Austin, Austin, TX

78712(USA)

*Supporting Information*

## **EXPERIMENTAL SECTION**

### **Synthesis**

Host-2: Boronic acid host-2 was synthesized by reductive amination according to a published procedure.<sup>1</sup>

Complex 7: Host 2 (0.5 mmol, 178.6 mg) and (*S,S*)-hydrobenzoin (0.5 mmol, 107.1 mg) were dissolved in CHCl<sub>3</sub> (2.5 mL) and stirred with 1 g MgSO<sub>4</sub> suspension at room temperature for 30 min. MgSO<sub>4</sub> was removed by vacuum filtration and the filtrate was concentrated. The crude product was dissolved in CHCl<sub>3</sub> (5 mL) and concentrated again in order to azeotropically remove the condensed water. The product was purified by crystallization by diffusing methanol into the concentrated CHCl<sub>3</sub> solution. The crystals from the CH<sub>3</sub>OH solution were submitted for x-ray crystallographic analysis.

Host (*S,S*)-**2** [2-(((2*S*,5*S*)-2,5-diphenylpyrrolidin-1-yl)methyl)phenylboronic acid]: mp 118 - 128 °C. <sup>1</sup>H NMR (600 MHz, CD<sub>3</sub>OD) δ 7.29 (m, 10H), 7.13 (m, 3H), 6.81 (b, 1H), 4.39 (m, 1H), 3.57 (d, J = 13.6 Hz, 1H), 3.26 (d, J = 13.7 Hz, 1H), 2.58 (m, 2H), 2.17 (m, 2H) ppm. <sup>13</sup>C NMR (150 MHz, DMSO) δ 141.79, 133.72, 130.05, 129.24, 128.65, 127.40, 67.89, 55.66, 33.04, 30.65 ppm. HRMS (M+H) calc: 358.1934; found: 358.1973

Host (*R,R*)-**2** [2-(((2*R*,5*R*)-2,5-diphenylpyrrolidin-1-yl)methyl)phenylboronic acid]: mp 98 - 117 °C. <sup>1</sup>H NMR (600 MHz, CD<sub>3</sub>OD) δ 7.29 (m, 10H), 7.14 (m, 3H), 6.81 (b, 1H), 4.39 (m, 1H), 3.57 (d, J = 13.6 Hz, 1H), 3.29 (d, J = 13.7 Hz, 1H), 2.58 (m, 2H), 2.17 (m, 2H) ppm. <sup>13</sup>C NMR (150 MHz, DMSO) δ 141.73, 133.45, 130.06, 129.24, 128.67, 127.41, 67.89, 55.46, 33.02, 30.65 ppm. HRMS (M+H) calc: 358.1934; found: 358.1973.

Complex **7**: mp 162-169°C. <sup>1</sup>H NMR (500 MHz, CDCl<sub>3</sub>) δ 7.87 (m, 2H), δ 7.52 (m, 1H), δ 7.37 (m, 6H), δ 7.27 (m, 12H), δ 7.12 (m, 4H), δ 4.37 (m, 2H), δ 3.80 (d, J = 16.1 Hz, 1H), δ 3.74 (d, J = 16.2 Hz, 1H), δ 2.61 (m, 2H), δ 2.03 (m, 2H) ppm. <sup>13</sup>C NMR (125 MHz, CDCl<sub>3</sub>) δ 147.16, 143.83, 140.29, 135.87, 131.33, 128.61, 128.12, 128.09, 128.05, 128.01, 126.73, 125.80, 125.40, 86.52, 65.19, 50.55, 33.14 ppm. HRMS (M+H) calc: 536.2716; found: 536.2755.

### UV-vis Titrations:

UV-vis titrations were performed on a Beckman DU-640 UV-vis spectrophotometer. Stock solutions of the hosts, indicators, and diols were made in 10 mM buffer solution pH 7.4 (Hunig's base and *para*-toluenesulfonic acid) in 100% spectral grade degassed methanol. All measurements were taken at 25°C.

The ideal host and indicator combinations for enantiomeric discrimination were determined by generating 1:1 binding isotherms via UV-vis titration between the host and the indicator (**Figure S1-S6**).

During the titration, the solution was allowed to equilibrate for 3 min after each addition, and the

absorbance spectra was recorded until the change in absorbance from one reading to the next was < 0.03. The binding constants ( $K_{HI}$ ) between the host and the indicators were determined from a 1:1 binding isotherm (**Table 1**).

The binding constant between the host and the guest  $K_{HG}$  was determined by measuring the change in absorbance of the host:indicator solution with the addition of the guest. ML was the selected indicator for this analysis. The optimum ratio of host-2 (440  $\mu\text{M}$ ) to ML (75  $\mu\text{M}$ ) ( $\sim 90\%$  saturation) was used as determined by the host:indicator binding isotherm.

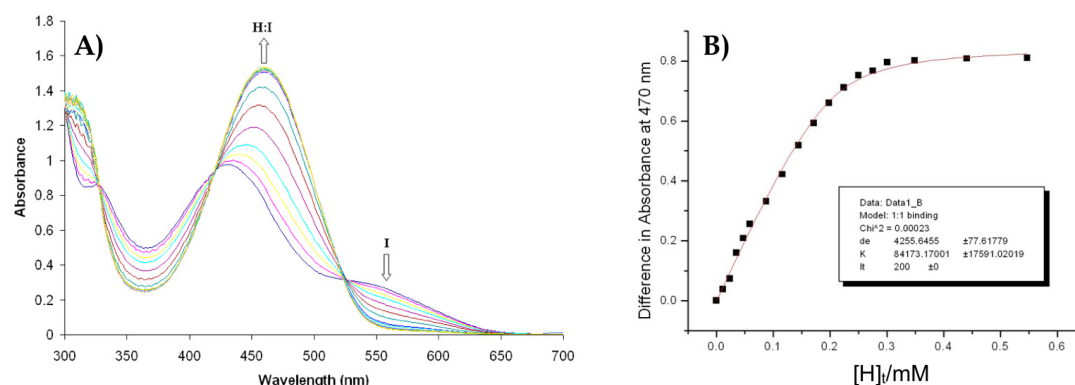

**Figure S1:** **A)** UV-visible titration of host (*S,S*)-2 with A (200  $\mu\text{M}$ ), Host:Indicator complex (H:I), free indicator (I) **B)** 1:1 binding isotherm (plot of the difference in absorbance at 470 nm with the addition of the host). Stock solutions were prepared in 100% degassed spectral grade MeOH, using 10 mM *para*-toluenesulfonic acid and Hunig's base buffer, pH 7.4. Association constant:  $K_{HI}$ ; difference in molar absorptivity between the H:I complex and free I:  $de$ ; total indicator concentration:  $I_t$ . The solid line is the calculated curve resulting from iterative data fitting to a 1:1 binding isotherm. All measurements were taken at 25°C.<sup>2</sup>

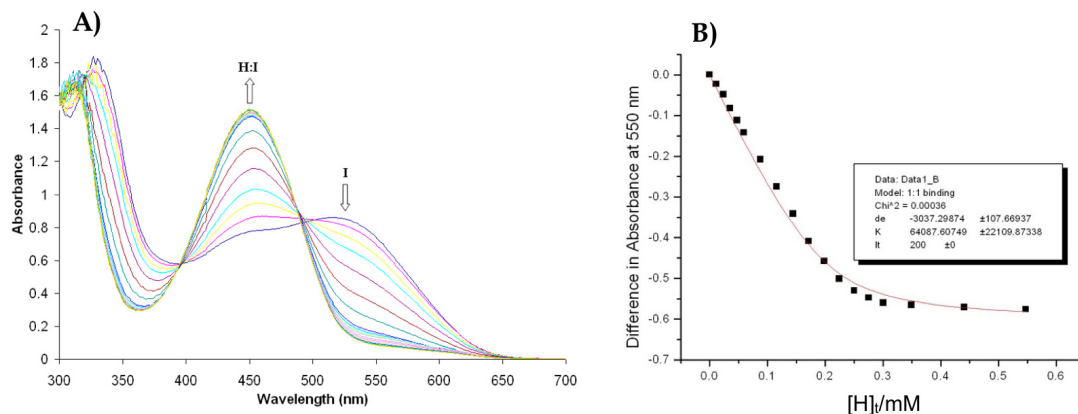

**Figure S2:** A) UV-visible titration of host (*S,S*)-2 with AC (200  $\mu$ M), Host:Indicator complex (H:I), free indicator (I) B) 1:1 binding isotherm (plot of the difference in absorbance at 550 nm with the addition of the host). Stock solutions were prepared in 100% degassed spectral grade MeOH, using 10 mM *para*-toluenesulfonic acid and Hunig's base buffer, pH 7.4. Association constant:  $K_{HI}$ ; difference in molar absorptivity between the H:I complex and free I:  $de$ ; total indicator concentration:  $I_t$ . The solid line is the calculated curve resulting from iterative data fitting to a 1:1 binding isotherm. All measurements were taken at 25°C.<sup>2</sup>

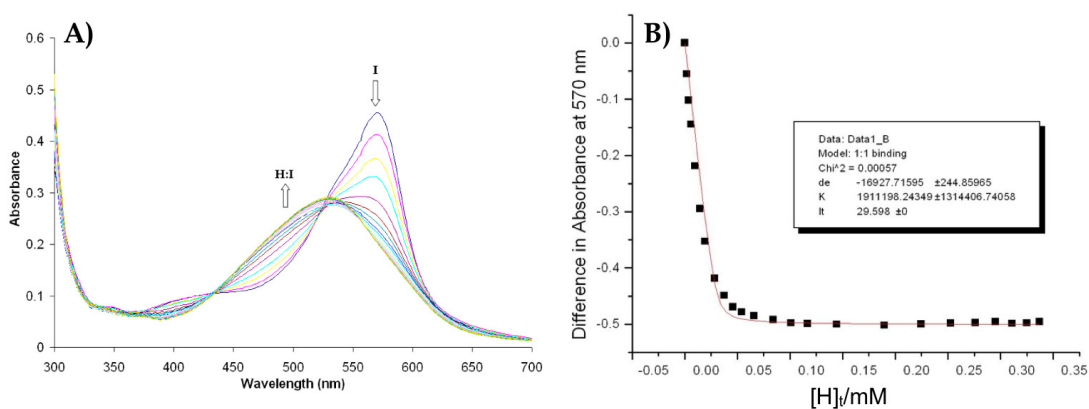

**Figure S3:** A) UV-visible titration of host (*S,S*)-2 with BPG (29.59  $\mu$ M), Host/Indicator complex (H:I), free indicator (I) B) 1:1 binding isotherm (plot of the difference in absorbance at 570 nm with the addition of the host). Stock solutions were prepared in 100% degassed spectral grade MeOH, using 10

mM *para*-toluenesulfonic acid and Hunig's base buffer, pH 7.4. Association constant:  $K_{HI}$ ; difference in molar absorptivity between the H:I complex and free I:  $\Delta\epsilon$ ; total indicator concentration:  $I_t$ . The solid line is the calculated curve resulting from iterative data fitting to a 1:1 binding isotherm. All measurements were taken at 25°C.<sup>2</sup>

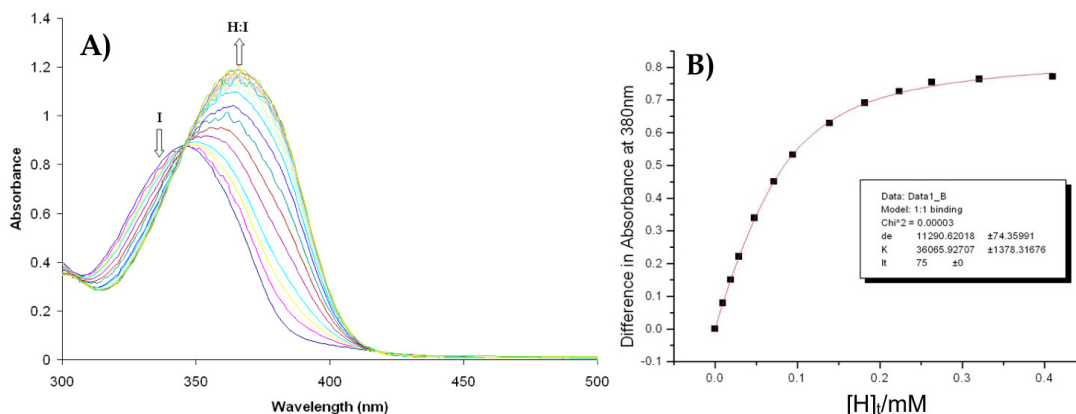

**Figure S4:** **A)** UV-visible titration of host (*S,S*)-**2** with ML (75 μM), Host:Indicator complex (H:I), free indicator (I) **B)** 1:1 binding isotherm (plot of the difference in absorbance at 380 nm with the addition of the host). Stock solutions were prepared in 100% degassed spectral grade MeOH, using 10 mM *para*-toluenesulfonic acid and Hunig's base buffer, pH 7.4. Association constant:  $K_{HI}$ ; difference in molar absorptivity between the H:I complex and free I:  $\Delta\epsilon$ ; total indicator concentration:  $I_t$ . The solid line is the calculated curve resulting from iterative data fitting to a 1:1 binding isotherm. All measurements were taken at 25°C.<sup>2</sup>

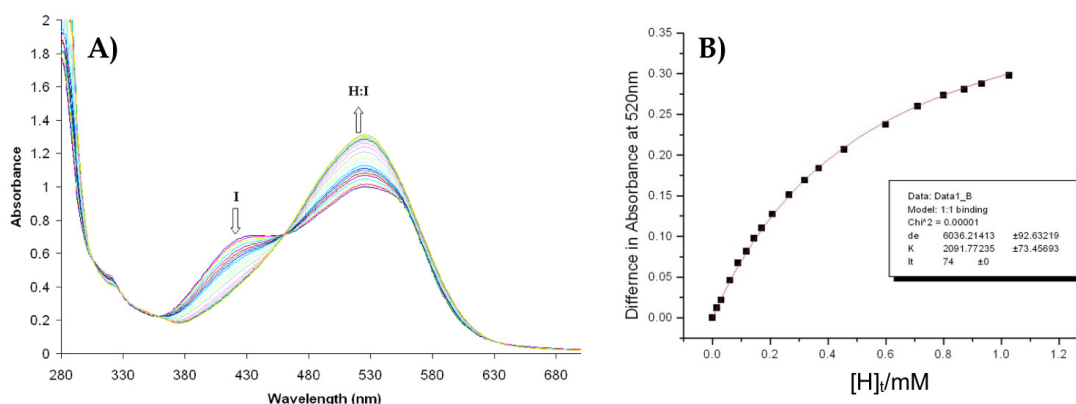

**Figure S5:** A) UV-visible titration of host (*S,S*)-2 with PG (74  $\mu\text{M}$ ), Host:Indicator complex (H:I), free indicator (I) B) 1:1 binding isotherm (plot of the difference in absorbance at 520 nm with the addition of the host). Stock solutions were prepared in 100% degassed spectral grade MeOH, using 10 mM *para*-toluenesulfonic acid and Hunig's base buffer, pH 7.4. Association constant:  $K_{HI}$ ; difference in molar absorptivity between the H:I complex and free I:  $\Delta\epsilon$ ; total indicator concentration:  $I_t$ . The solid line is the calculated curve resulting from iterative data fitting to a 1:1 binding isotherm. All measurements were taken at 25°C.<sup>2</sup>

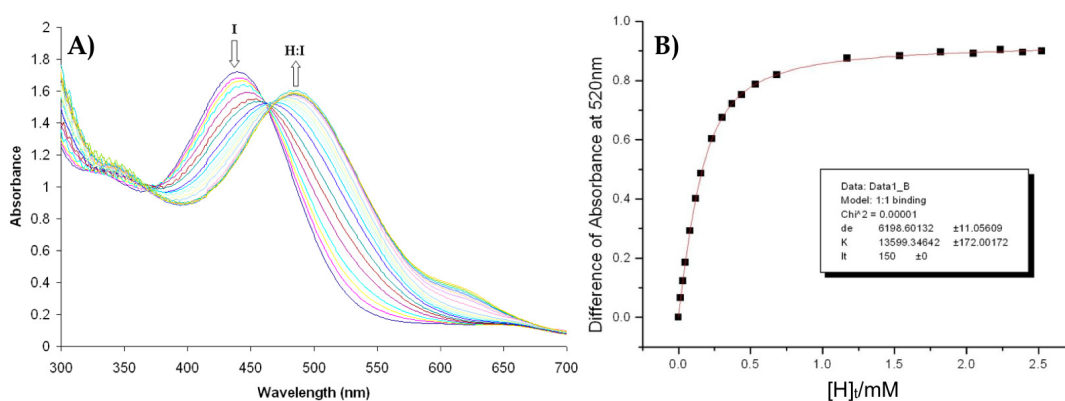

**Figure S6:** A) UV-visible titration of host (*S,S*)-2 with PV (150  $\mu\text{M}$ ), Host:Indicator complex (H:I), free indicator (I) B) 1:1 binding isotherm (plot of the difference in absorbance at 520 nm with the addition of the host). Stock solutions were prepared in 100% degassed spectral grade MeOH, using 10 mM *para*-toluenesulfonic acid and Hunig's base buffer, pH 7.4. Association constant:  $K_{HI}$ ; difference in molar absorptivity between the H:I complex and free I:  $\Delta\epsilon$ ; total indicator concentration:  $I_t$ . The solid line is the calculated curve resulting from iterative data fitting to a 1:1 binding isotherm. All measurements were taken at 25°C.<sup>2</sup>

### NMR Analysis of the Enantiomeric Purity of **4**:<sup>3</sup>

2-Formylphenylboronic acid (14.9 mg, 0.1 mole) and (*R*)- $\alpha$  methylbenzylamine (12.7  $\mu$ L, 0.1 mole) were dissolved in CDCl<sub>3</sub> (1 mL), in a dry glass vial equipped with a few 4 Å molecular sieves. (18.02 mg, 0.1 mole) of the diol (3,4 dihydroxy-4-phenyl-butane-2-one) obtained from the asymmetric dihydroxylation reactions was added to the solution. The mixture was allowed to stand with occasional shaking for 5 min. <sup>1</sup>H NMR of the resulting solution was recorded (**Figure S7**).

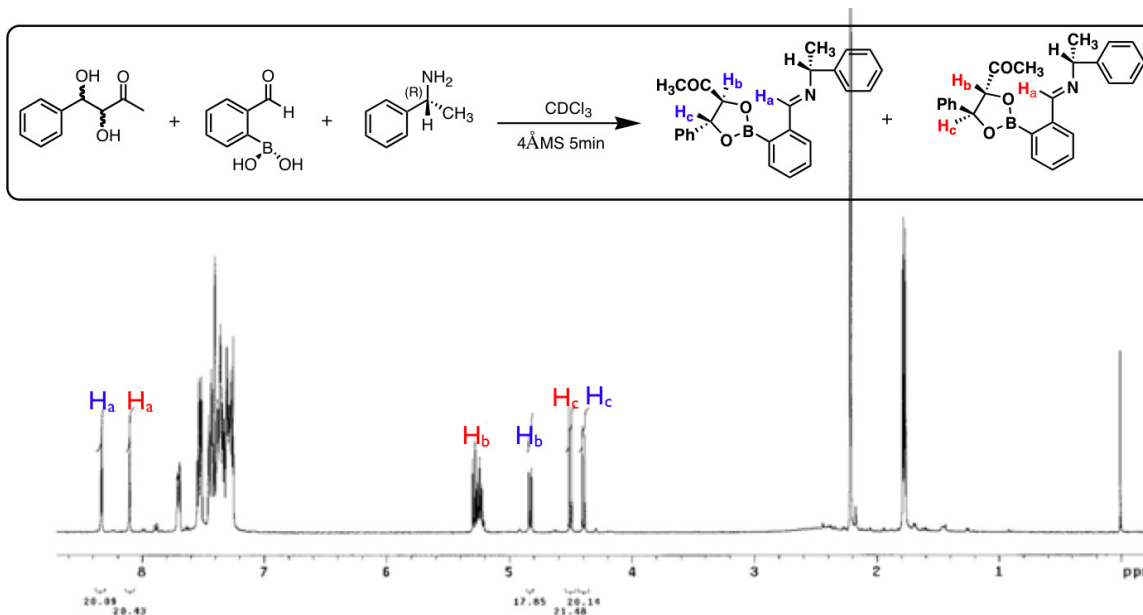

**Figure S7:** <sup>1</sup>H NMR 300 MHz on a Varian Mercury 300 spectrometer in CDCl<sub>3</sub> of the racemic mixture of **4** after derivatization.

### 96-well Plate Analysis:

Arrays were made by mixing host, indicator, and guest stock solutions within a Costar EIA/RIA polystyrene 96-well flat bottom plate. BioTek Precision™ microplate pipetting system was used to add stock solution to the 96-well plate. Each well contained a total solution volume of 300  $\mu$ L. After making the plate, it was sealed with a UC-500 sealing film to prevent solvent evaporation. The absorbance spectra of the 96-well plate were recorded on a BioTek Synergy™ 4 multi-detection microplate reader.

**Table S1:** Concentration of the hosts and the indicators used in the 96-well plate.

| Indicator               | Host ( <i>S,S</i> )-1 | Host ( <i>S,S</i> )-2 |
|-------------------------|-----------------------|-----------------------|
| A (200 $\mu\text{M}$ )  | 300 $\mu\text{M}$     | 400 $\mu\text{M}$     |
| AC (200 $\mu\text{M}$ ) | 446 $\mu\text{M}$     | 300 $\mu\text{M}$     |
| BPG (60 $\mu\text{M}$ ) | 180 $\mu\text{M}$     | 200 $\mu\text{M}$     |
| ML (125 $\mu\text{M}$ ) | 380 $\mu\text{M}$     | 340 $\mu\text{M}$     |
| PG (150 $\mu\text{M}$ ) | 546 $\mu\text{M}$     | 300 $\mu\text{M}$     |
| PV (150 $\mu\text{M}$ ) | 680 $\mu\text{M}$     | 300 $\mu\text{M}$     |

**Table S2:** The UV-vis data used for principal component analysis. **3a:** (*R,R*)-Hydrobenzoin, **3b:** (*S,S*)-Hydrobenzoin, **4a:** (3*S*,4*R*)-3,4-Dihydroxy-4-phenyl-butane-2-one, **4b:** (3*R*,4*S*)-3,4-Dihydroxy-4-phenyl-butane-2-one, **5a:** Methyl-(2*S*,3*R*)-2,3-dihydroxy-3-phenyl-propionate, **5b:** Methyl-(2*R*,3*S*)-2,3-dihydroxy-3-phenyl-propionate, **6a:** Diethyl-D-tartrate, **6b:** Diethyl-L-tartrate.

| Diols     | Absorbance of Host ( <i>R,R</i> )-2 and ML |        |        | Absorbance of Host ( <i>S,S</i> )-1 and PV |        |        | Absorbance of Host ( <i>S,S</i> )-2 and PV |        |        |
|-----------|--------------------------------------------|--------|--------|--------------------------------------------|--------|--------|--------------------------------------------|--------|--------|
|           | 362 nm                                     | 366 nm | 374 nm | 496 nm                                     | 500 nm | 516 nm | 496 nm                                     | 500 nm | 516 nm |
| <b>3a</b> | 1.091                                      | 0.997  | 0.754  | 0.780                                      | 0.736  | 0.565  | 0.923                                      | 0.885  | 0.721  |
| <b>3a</b> | 1.085                                      | 0.992  | 0.751  | 0.780                                      | 0.735  | 0.565  | 0.920                                      | 0.882  | 0.719  |
| <b>3a</b> | 1.091                                      | 0.996  | 0.753  | 0.785                                      | 0.741  | 0.568  | 0.923                                      | 0.886  | 0.722  |
| <b>3a</b> | 1.095                                      | 1.001  | 0.756  | 0.788                                      | 0.744  | 0.571  | 0.925                                      | 0.888  | 0.722  |
| <b>3b</b> | 1.304                                      | 1.255  | 1.083  | 0.702                                      | 0.653  | 0.476  | 0.724                                      | 0.676  | 0.498  |
| <b>3b</b> | 1.282                                      | 1.232  | 1.061  | 0.701                                      | 0.653  | 0.476  | 0.733                                      | 0.685  | 0.505  |
| <b>3b</b> | 1.306                                      | 1.256  | 1.085  | 0.704                                      | 0.656  | 0.478  | 0.735                                      | 0.687  | 0.507  |
| <b>3b</b> | 1.306                                      | 1.257  | 1.088  | 0.707                                      | 0.658  | 0.480  | 0.722                                      | 0.674  | 0.497  |
| <b>6a</b> | 1.361                                      | 1.323  | 1.171  | 0.996                                      | 0.964  | 0.812  | 1.073                                      | 1.043  | 0.889  |
| <b>6a</b> | 1.360                                      | 1.322  | 1.170  | 0.992                                      | 0.960  | 0.809  | 1.076                                      | 1.047  | 0.892  |



|           |       |       |       |       |       |       |       |       |       |
|-----------|-------|-------|-------|-------|-------|-------|-------|-------|-------|
| <b>6a</b> | 1.355 | 1.317 | 1.165 | 0.990 | 0.959 | 0.807 | 1.077 | 1.047 | 0.893 |
| <b>6a</b> | 1.357 | 1.32  | 1.168 | 0.995 | 0.963 | 0.811 | 1.082 | 1.053 | 0.898 |
| <b>6b</b> | 1.418 | 1.393 | 1.262 | 0.960 | 0.926 | 0.770 | 0.982 | 0.947 | 0.786 |
| <b>6b</b> | 1.426 | 1.401 | 1.269 | 0.953 | 0.919 | 0.765 | 0.983 | 0.949 | 0.788 |
| <b>6b</b> | 1.427 | 1.402 | 1.271 | 0.959 | 0.925 | 0.769 | 0.985 | 0.950 | 0.788 |
| <b>6b</b> | 1.432 | 1.407 | 1.276 | 0.960 | 0.926 | 0.770 | 0.991 | 0.955 | 0.793 |
| <b>4a</b> | 1.365 | 1.329 | 1.18  | 0.845 | 0.803 | 0.633 | 0.87  | 0.828 | 0.653 |
| <b>4a</b> | 1.357 | 1.321 | 1.172 | 0.845 | 0.803 | 0.633 | 0.875 | 0.832 | 0.657 |
| <b>4a</b> | 1.392 | 1.356 | 1.203 | 0.846 | 0.804 | 0.634 | 0.873 | 0.830 | 0.654 |
| <b>4a</b> | 1.394 | 1.356 | 1.202 | 0.847 | 0.805 | 0.635 | 0.870 | 0.827 | 0.651 |
| <b>4b</b> | 1.260 | 1.191 | 0.985 | 0.910 | 0.871 | 0.707 | 1.015 | 0.981 | 0.817 |
| <b>4b</b> | 1.258 | 1.191 | 0.987 | 0.910 | 0.872 | 0.708 | 1.018 | 0.983 | 0.819 |
| <b>4b</b> | 1.258 | 1.191 | 0.986 | 0.912 | 0.873 | 0.709 | 1.012 | 0.977 | 0.814 |
| <b>4b</b> | 1.256 | 1.188 | 0.984 | 0.906 | 0.867 | 0.704 | 1.011 | 0.976 | 0.813 |
| <b>5a</b> | 1.202 | 1.124 | 0.902 | 0.882 | 0.843 | 0.679 | 1.009 | 0.974 | 0.812 |
| <b>5a</b> | 1.193 | 1.113 | 0.892 | 0.881 | 0.842 | 0.678 | 1.005 | 0.970 | 0.811 |
| <b>5a</b> | 1.196 | 1.118 | 0.896 | 0.882 | 0.843 | 0.678 | 1.013 | 0.979 | 0.816 |
| <b>5a</b> | 1.197 | 1.118 | 0.897 | 0.883 | 0.843 | 0.679 | 1.008 | 0.973 | 0.812 |
| <b>5b</b> | 1.370 | 1.333 | 1.183 | 0.827 | 0.784 | 0.613 | 0.809 | 0.764 | 0.586 |
| <b>5b</b> | 1.388 | 1.350 | 1.198 | 0.828 | 0.785 | 0.614 | 0.809 | 0.764 | 0.586 |
| <b>5b</b> | 1.378 | 1.341 | 1.191 | 0.823 | 0.779 | 0.610 | 0.809 | 0.764 | 0.585 |
| <b>5b</b> | 1.394 | 1.357 | 1.204 | 0.824 | 0.781 | 0.611 | 0.804 | 0.758 | 0.581 |

**Table S3:** UV-vis data for Training Artificial Neural Network and Principal Component Analysis

| Absorbance with Host (S,S)-2 & PV |       |       |       | Absorbance with Host (R,R)-2 & ML |       |       |       |       | Absorbance with Host (S,S)-1 & BPG |       |       |       |       | [G],mM | %5a |
|-----------------------------------|-------|-------|-------|-----------------------------------|-------|-------|-------|-------|------------------------------------|-------|-------|-------|-------|--------|-----|
| 512nm                             | 514nm | 516nm | 518nm | 376nm                             | 378nm | 380nm | 382nm | 384nm | 570nm                              | 572nm | 574nm | 576nm | 578nm |        |     |
| 0.922                             | 0.903 | 0.881 | 0.860 | 0.936                             | 0.893 | 0.843 | 0.792 | 0.737 | 1.035                              | 1.024 | 1.008 | 0.985 | 0.956 | 2.00   | 100 |
| 0.898                             | 0.879 | 0.858 | 0.838 | 0.940                             | 0.896 | 0.845 | 0.794 | 0.738 | 1.032                              | 1.021 | 1.005 | 0.982 | 0.954 | 2.00   | 100 |
| 0.881                             | 0.862 | 0.842 | 0.822 | 0.952                             | 0.908 | 0.856 | 0.805 | 0.747 | 1.031                              | 1.020 | 1.004 | 0.981 | 0.953 | 2.00   | 100 |
| 0.892                             | 0.872 | 0.851 | 0.830 | 1.023                             | 0.978 | 0.925 | 0.870 | 0.810 | 1.115                              | 1.104 | 1.087 | 1.063 | 1.032 | 2.00   | 80  |

|       |       |       |       |       |       |       |       |       |       |       |       |       |       |      |     |
|-------|-------|-------|-------|-------|-------|-------|-------|-------|-------|-------|-------|-------|-------|------|-----|
| 0.890 | 0.871 | 0.849 | 0.829 | 1.014 | 0.969 | 0.916 | 0.862 | 0.802 | 1.051 | 1.040 | 1.024 | 1.001 | 0.972 | 2.00 | 80  |
| 0.889 | 0.870 | 0.848 | 0.827 | 1.019 | 0.974 | 0.920 | 0.866 | 0.806 | 1.051 | 1.041 | 1.025 | 1.002 | 0.973 | 2.00 | 80  |
| 0.870 | 0.851 | 0.829 | 0.808 | 1.046 | 1.001 | 0.948 | 0.893 | 0.831 | 1.124 | 1.113 | 1.096 | 1.073 | 1.042 | 2.00 | 70  |
| 0.868 | 0.848 | 0.827 | 0.806 | 1.045 | 1.000 | 0.947 | 0.892 | 0.830 | 1.125 | 1.114 | 1.097 | 1.073 | 1.042 | 2.00 | 70  |
| 0.871 | 0.852 | 0.830 | 0.809 | 1.041 | 0.995 | 0.942 | 0.887 | 0.826 | 1.064 | 1.054 | 1.038 | 1.016 | 0.986 | 2.00 | 70  |
| 0.852 | 0.832 | 0.811 | 0.790 | 1.068 | 1.023 | 0.970 | 0.914 | 0.853 | 1.142 | 1.131 | 1.115 | 1.091 | 1.059 | 2.00 | 60  |
| 0.849 | 0.830 | 0.808 | 0.788 | 1.079 | 1.035 | 0.981 | 0.925 | 0.862 | 1.138 | 1.128 | 1.111 | 1.087 | 1.056 | 2.00 | 60  |
| 0.852 | 0.832 | 0.811 | 0.790 | 1.054 | 1.010 | 0.956 | 0.901 | 0.839 | 1.143 | 1.132 | 1.115 | 1.092 | 1.06  | 2.00 | 60  |
| 0.838 | 0.818 | 0.797 | 0.776 | 1.105 | 1.061 | 1.007 | 0.951 | 0.888 | 1.159 | 1.148 | 1.131 | 1.107 | 1.075 | 2.00 | 50  |
| 0.836 | 0.817 | 0.795 | 0.774 | 1.079 | 1.036 | 0.983 | 0.928 | 0.866 | 1.162 | 1.151 | 1.134 | 1.110 | 1.078 | 2.00 | 50  |
| 0.832 | 0.812 | 0.790 | 0.770 | 1.083 | 1.039 | 0.986 | 0.931 | 0.869 | 1.161 | 1.150 | 1.133 | 1.109 | 1.077 | 2.00 | 50  |
| 0.813 | 0.793 | 0.771 | 0.750 | 1.129 | 1.085 | 1.032 | 0.975 | 0.911 | 1.174 | 1.163 | 1.146 | 1.122 | 1.09  | 2.00 | 40  |
| 0.811 | 0.791 | 0.770 | 0.749 | 1.125 | 1.081 | 1.028 | 0.971 | 0.907 | 1.167 | 1.157 | 1.141 | 1.117 | 1.084 | 2.00 | 40  |
| 0.816 | 0.796 | 0.775 | 0.754 | 1.131 | 1.088 | 1.034 | 0.977 | 0.912 | 1.176 | 1.165 | 1.149 | 1.124 | 1.092 | 2.00 | 40  |
| 0.783 | 0.763 | 0.742 | 0.721 | 1.188 | 1.146 | 1.093 | 1.036 | 0.969 | 1.126 | 1.116 | 1.100 | 1.077 | 1.046 | 2.00 | 20  |
| 0.783 | 0.763 | 0.741 | 0.721 | 1.190 | 1.148 | 1.095 | 1.037 | 0.970 | 1.160 | 1.150 | 1.134 | 1.110 | 1.078 | 2.00 | 20  |
| 0.780 | 0.760 | 0.739 | 0.718 | 1.190 | 1.148 | 1.095 | 1.037 | 0.970 | 1.093 | 1.084 | 1.068 | 1.046 | 1.016 | 2.00 | 20  |
| 0.759 | 0.739 | 0.717 | 0.696 | 1.248 | 1.208 | 1.155 | 1.098 | 1.028 | 1.153 | 1.144 | 1.128 | 1.104 | 1.073 | 2.00 | 0   |
| 0.757 | 0.737 | 0.715 | 0.694 | 1.252 | 1.210 | 1.158 | 1.100 | 1.031 | 1.188 | 1.178 | 1.162 | 1.137 | 1.105 | 2.00 | 0   |
| 0.752 | 0.732 | 0.711 | 0.690 | 1.254 | 1.213 | 1.161 | 1.103 | 1.033 | 1.150 | 1.140 | 1.125 | 1.101 | 1.07  | 2.00 | 0   |
| 0.821 | 0.803 | 0.782 | 0.762 | 0.818 | 0.770 | 0.718 | 0.668 | 0.616 | 1.132 | 1.123 | 1.108 | 1.084 | 1.053 | 4.00 | 100 |
| 0.851 | 0.831 | 0.810 | 0.790 | 0.807 | 0.760 | 0.708 | 0.658 | 0.607 | 1.185 | 1.176 | 1.159 | 1.135 | 1.102 | 4.00 | 100 |
| 0.845 | 0.826 | 0.805 | 0.784 | 0.820 | 0.772 | 0.720 | 0.670 | 0.618 | 1.108 | 1.099 | 1.084 | 1.061 | 1.031 | 4.00 | 100 |
| 0.799 | 0.779 | 0.758 | 0.738 | 0.872 | 0.823 | 0.769 | 0.717 | 0.663 | 1.214 | 1.206 | 1.189 | 1.165 | 1.132 | 4.00 | 80  |
| 0.792 | 0.773 | 0.752 | 0.732 | 0.907 | 0.858 | 0.805 | 0.752 | 0.697 | 1.207 | 1.199 | 1.182 | 1.158 | 1.125 | 4.00 | 80  |
| 0.783 | 0.763 | 0.743 | 0.723 | 0.882 | 0.833 | 0.779 | 0.727 | 0.672 | 1.209 | 1.200 | 1.184 | 1.160 | 1.126 | 4.00 | 80  |
| 0.765 | 0.745 | 0.724 | 0.704 | 0.911 | 0.863 | 0.809 | 0.756 | 0.699 | 1.237 | 1.229 | 1.213 | 1.188 | 1.154 | 4.00 | 70  |
| 0.767 | 0.748 | 0.727 | 0.707 | 0.910 | 0.861 | 0.808 | 0.755 | 0.699 | 1.228 | 1.220 | 1.204 | 1.180 | 1.146 | 4.00 | 70  |
| 0.762 | 0.743 | 0.722 | 0.702 | 0.888 | 0.841 | 0.788 | 0.735 | 0.680 | 1.212 | 1.203 | 1.187 | 1.163 | 1.13  | 4.00 | 70  |
| 0.734 | 0.715 | 0.694 | 0.674 | 0.930 | 0.882 | 0.827 | 0.774 | 0.717 | 1.256 | 1.248 | 1.232 | 1.207 | 1.173 | 4.00 | 60  |
| 0.739 | 0.719 | 0.698 | 0.678 | 0.934 | 0.886 | 0.832 | 0.778 | 0.721 | 1.247 | 1.239 | 1.223 | 1.199 | 1.165 | 4.00 | 60  |
| 0.732 | 0.712 | 0.692 | 0.672 | 0.935 | 0.887 | 0.833 | 0.780 | 0.722 | 1.235 | 1.227 | 1.211 | 1.187 | 1.153 | 4.00 | 60  |
| 0.714 | 0.694 | 0.673 | 0.653 | 0.968 | 0.920 | 0.865 | 0.811 | 0.753 | 1.269 | 1.261 | 1.245 | 1.220 | 1.185 | 4.00 | 50  |
| 0.713 | 0.694 | 0.673 | 0.653 | 0.964 | 0.917 | 0.863 | 0.809 | 0.750 | 1.265 | 1.257 | 1.241 | 1.216 | 1.182 | 4.00 | 50  |
| 0.703 | 0.683 | 0.663 | 0.643 | 0.956 | 0.909 | 0.855 | 0.802 | 0.743 | 1.244 | 1.237 | 1.221 | 1.196 | 1.162 | 4.00 | 50  |
| 0.695 | 0.675 | 0.654 | 0.634 | 1.003 | 0.955 | 0.901 | 0.846 | 0.786 | 1.249 | 1.241 | 1.226 | 1.201 | 1.168 | 4.00 | 40  |
| 0.694 | 0.674 | 0.653 | 0.633 | 1.003 | 0.957 | 0.902 | 0.847 | 0.787 | 1.279 | 1.271 | 1.256 | 1.231 | 1.196 | 4.00 | 40  |
| 0.683 | 0.663 | 0.642 | 0.623 | 0.992 | 0.946 | 0.892 | 0.837 | 0.778 | 1.265 | 1.258 | 1.242 | 1.217 | 1.183 | 4.00 | 40  |
| 0.660 | 0.640 | 0.619 | 0.600 | 1.088 | 1.042 | 0.989 | 0.932 | 0.869 | 1.283 | 1.276 | 1.260 | 1.236 | 1.201 | 4.00 | 20  |
| 0.659 | 0.640 | 0.618 | 0.599 | 1.085 | 1.040 | 0.986 | 0.930 | 0.867 | 1.278 | 1.271 | 1.256 | 1.231 | 1.196 | 4.00 | 20  |
| 0.645 | 0.625 | 0.605 | 0.586 | 1.078 | 1.034 | 0.980 | 0.925 | 0.861 | 1.259 | 1.252 | 1.237 | 1.212 | 1.178 | 4.00 | 20  |
| 0.633 | 0.613 | 0.592 | 0.572 | 1.187 | 1.144 | 1.090 | 1.033 | 0.966 | 1.309 | 1.303 | 1.287 | 1.262 | 1.226 | 4.00 | 0   |
| 0.637 | 0.617 | 0.595 | 0.576 | 1.188 | 1.144 | 1.091 | 1.034 | 0.967 | 1.300 | 1.294 | 1.278 | 1.253 | 1.217 | 4.00 | 0   |

|       |       |       |       |       |       |       |       |       |       |       |       |       |       |      |     |
|-------|-------|-------|-------|-------|-------|-------|-------|-------|-------|-------|-------|-------|-------|------|-----|
| 0.624 | 0.604 | 0.584 | 0.564 | 1.166 | 1.124 | 1.072 | 1.016 | 0.950 | 1.272 | 1.265 | 1.250 | 1.226 | 1.192 | 4.00 | 0   |
| 0.833 | 0.814 | 0.793 | 0.772 | 0.759 | 0.711 | 0.660 | 0.611 | 0.562 | 1.192 | 1.184 | 1.168 | 1.143 | 1.111 | 5.00 | 100 |
| 0.837 | 0.818 | 0.796 | 0.776 | 0.761 | 0.714 | 0.662 | 0.614 | 0.565 | 1.152 | 1.144 | 1.128 | 1.105 | 1.073 | 5.00 | 100 |
| 0.830 | 0.811 | 0.789 | 0.769 | 0.771 | 0.724 | 0.671 | 0.622 | 0.573 | 1.209 | 1.200 | 1.184 | 1.160 | 1.126 | 5.00 | 100 |
| 0.772 | 0.752 | 0.731 | 0.711 | 0.813 | 0.766 | 0.713 | 0.663 | 0.612 | 1.246 | 1.238 | 1.222 | 1.197 | 1.163 | 5.00 | 80  |
| 0.777 | 0.757 | 0.735 | 0.715 | 0.804 | 0.757 | 0.705 | 0.656 | 0.605 | 1.247 | 1.239 | 1.223 | 1.198 | 1.164 | 5.00 | 80  |
| 0.772 | 0.752 | 0.731 | 0.711 | 0.838 | 0.789 | 0.735 | 0.684 | 0.630 | 1.232 | 1.224 | 1.208 | 1.184 | 1.15  | 5.00 | 80  |
| 0.737 | 0.718 | 0.697 | 0.677 | 0.859 | 0.810 | 0.755 | 0.704 | 0.649 | 1.261 | 1.253 | 1.238 | 1.213 | 1.179 | 5.00 | 70  |
| 0.729 | 0.710 | 0.689 | 0.669 | 0.863 | 0.813 | 0.759 | 0.706 | 0.652 | 1.268 | 1.260 | 1.244 | 1.220 | 1.185 | 5.00 | 70  |
| 0.741 | 0.721 | 0.700 | 0.680 | 0.862 | 0.813 | 0.759 | 0.706 | 0.652 | 1.255 | 1.247 | 1.232 | 1.207 | 1.173 | 5.00 | 70  |
| 0.705 | 0.685 | 0.664 | 0.644 | 0.872 | 0.824 | 0.771 | 0.720 | 0.665 | 1.288 | 1.281 | 1.265 | 1.240 | 1.205 | 5.00 | 60  |
| 0.706 | 0.686 | 0.665 | 0.645 | 0.875 | 0.826 | 0.773 | 0.721 | 0.666 | 1.282 | 1.275 | 1.259 | 1.234 | 1.199 | 5.00 | 60  |
| 0.704 | 0.685 | 0.663 | 0.643 | 0.891 | 0.842 | 0.788 | 0.735 | 0.679 | 1.272 | 1.264 | 1.248 | 1.224 | 1.189 | 5.00 | 60  |
| 0.681 | 0.661 | 0.640 | 0.620 | 0.923 | 0.875 | 0.821 | 0.767 | 0.709 | 1.304 | 1.297 | 1.282 | 1.256 | 1.221 | 5.00 | 50  |
| 0.685 | 0.665 | 0.644 | 0.624 | 0.920 | 0.871 | 0.816 | 0.762 | 0.705 | 1.300 | 1.293 | 1.277 | 1.252 | 1.217 | 5.00 | 50  |
| 0.678 | 0.659 | 0.638 | 0.618 | 0.903 | 0.856 | 0.803 | 0.750 | 0.695 | 1.290 | 1.283 | 1.267 | 1.243 | 1.207 | 5.00 | 50  |
| 0.660 | 0.640 | 0.619 | 0.599 | 0.958 | 0.910 | 0.855 | 0.801 | 0.743 | 1.327 | 1.320 | 1.304 | 1.279 | 1.243 | 5.00 | 40  |
| 0.659 | 0.639 | 0.618 | 0.598 | 0.956 | 0.908 | 0.854 | 0.800 | 0.741 | 1.316 | 1.309 | 1.294 | 1.268 | 1.232 | 5.00 | 40  |
| 0.661 | 0.641 | 0.620 | 0.601 | 0.943 | 0.896 | 0.843 | 0.790 | 0.732 | 1.308 | 1.302 | 1.286 | 1.261 | 1.225 | 5.00 | 40  |
| 0.630 | 0.610 | 0.589 | 0.569 | 1.050 | 1.004 | 0.950 | 0.894 | 0.832 | 1.317 | 1.310 | 1.295 | 1.270 | 1.235 | 5.00 | 20  |
| 0.627 | 0.607 | 0.586 | 0.566 | 1.050 | 1.003 | 0.950 | 0.894 | 0.832 | 1.306 | 1.299 | 1.284 | 1.259 | 1.224 | 5.00 | 20  |
| 0.625 | 0.605 | 0.584 | 0.565 | 1.014 | 0.969 | 0.918 | 0.864 | 0.804 | 1.298 | 1.291 | 1.276 | 1.251 | 1.216 | 5.00 | 20  |
| 0.607 | 0.587 | 0.566 | 0.546 | 1.155 | 1.111 | 1.057 | 1.001 | 0.935 | 1.338 | 1.332 | 1.317 | 1.292 | 1.255 | 5.00 | 0   |
| 0.607 | 0.587 | 0.566 | 0.547 | 1.162 | 1.119 | 1.065 | 1.008 | 0.943 | 1.331 | 1.325 | 1.310 | 1.285 | 1.249 | 5.00 | 0   |
| 0.591 | 0.571 | 0.551 | 0.532 | 1.157 | 1.113 | 1.060 | 1.003 | 0.937 | 1.325 | 1.319 | 1.304 | 1.278 | 1.243 | 5.00 | 0   |

**Table S4:** UV-vis data of unknown solution for artificial neural network

| Absorbance with Host (S,S)-2 & PV |       |       |       | Absorbance with Host (R,R)-2 & ML |       |       |       |       | Absorbance with Host (S,S)-1 & BPG |       |       |       |       | [G],mM | %5a |
|-----------------------------------|-------|-------|-------|-----------------------------------|-------|-------|-------|-------|------------------------------------|-------|-------|-------|-------|--------|-----|
| 512nm                             | 514nm | 516nm | 518nm | 376nm                             | 378nm | 380nm | 382nm | 384nm | 570nm                              | 572nm | 574nm | 576nm | 578nm |        |     |
| 0.882                             | 0.863 | 0.842 | 0.822 | 0.852                             | 0.807 | 0.756 | 0.706 | 0.654 | 1.120                              | 1.11  | 1.093 | 1.070 | 1.038 | 3.00   | 100 |
| 0.874                             | 0.856 | 0.834 | 0.814 | 0.848                             | 0.803 | 0.752 | 0.703 | 0.651 | 1.118                              | 1.107 | 1.091 | 1.068 | 1.037 | 3.00   | 100 |
| 0.889                             | 0.869 | 0.848 | 0.827 | 0.856                             | 0.811 | 0.760 | 0.710 | 0.658 | 1.101                              | 1.09  | 1.074 | 1.051 | 1.02  | 3.00   | 100 |
| 0.824                             | 0.804 | 0.783 | 0.763 | 0.914                             | 0.869 | 0.817 | 0.765 | 0.709 | 1.160                              | 1.15  | 1.134 | 1.110 | 1.078 | 3.00   | 75  |
| 0.832                             | 0.813 | 0.792 | 0.771 | 0.908                             | 0.864 | 0.813 | 0.763 | 0.708 | 1.152                              | 1.142 | 1.125 | 1.102 | 1.070 | 3.00   | 75  |
| 0.829                             | 0.809 | 0.788 | 0.768 | 0.903                             | 0.858 | 0.807 | 0.756 | 0.702 | 1.147                              | 1.137 | 1.121 | 1.097 | 1.065 | 3.00   | 75  |
| 0.800                             | 0.781 | 0.76  | 0.739 | 0.957                             | 0.912 | 0.858 | 0.805 | 0.747 | 1.174                              | 1.164 | 1.148 | 1.124 | 1.092 | 3.00   | 65  |
| 0.790                             | 0.770 | 0.749 | 0.729 | 0.981                             | 0.934 | 0.88  | 0.826 | 0.767 | 1.171                              | 1.161 | 1.145 | 1.121 | 1.089 | 3.00   | 65  |
| 0.804                             | 0.784 | 0.763 | 0.743 | 0.976                             | 0.930 | 0.876 | 0.823 | 0.764 | 1.159                              | 1.149 | 1.133 | 1.109 | 1.077 | 3.00   | 65  |
| 0.769                             | 0.750 | 0.728 | 0.708 | 1.014                             | 0.968 | 0.914 | 0.859 | 0.799 | 1.198                              | 1.189 | 1.173 | 1.149 | 1.116 | 3.00   | 55  |
| 0.765                             | 0.745 | 0.724 | 0.704 | 1.020                             | 0.974 | 0.920 | 0.866 | 0.806 | 1.186                              | 1.176 | 1.160 | 1.136 | 1.104 | 3.00   | 55  |
| 0.770                             | 0.750 | 0.729 | 0.709 | 1.022                             | 0.976 | 0.923 | 0.868 | 0.808 | 1.175                              | 1.165 | 1.149 | 1.125 | 1.093 | 3.00   | 55  |
| 0.756                             | 0.736 | 0.715 | 0.695 | 1.045                             | 0.999 | 0.946 | 0.890 | 0.829 | 1.206                              | 1.197 | 1.181 | 1.157 | 1.124 | 3.00   | 50  |
| 0.754                             | 0.735 | 0.713 | 0.693 | 1.039                             | 0.994 | 0.940 | 0.885 | 0.824 | 1.199                              | 1.190 | 1.174 | 1.150 | 1.117 | 3.00   | 50  |
| 0.760                             | 0.740 | 0.719 | 0.699 | 1.027                             | 0.982 | 0.929 | 0.875 | 0.815 | 1.190                              | 1.180 | 1.164 | 1.140 | 1.107 | 3.00   | 50  |

|       |       |       |       |       |       |       |       |       |       |       |       |       |       |      |    |
|-------|-------|-------|-------|-------|-------|-------|-------|-------|-------|-------|-------|-------|-------|------|----|
| 0.737 | 0.717 | 0.696 | 0.676 | 1.074 | 1.029 | 0.976 | 0.920 | 0.857 | 1.22  | 1.211 | 1.195 | 1.171 | 1.138 | 3.00 | 35 |
| 0.737 | 0.717 | 0.696 | 0.675 | 1.070 | 1.026 | 0.972 | 0.917 | 0.854 | 1.220 | 1.210 | 1.194 | 1.170 | 1.137 | 3.00 | 35 |
| 0.735 | 0.716 | 0.695 | 0.674 | 1.069 | 1.025 | 0.972 | 0.917 | 0.855 | 1.207 | 1.198 | 1.181 | 1.157 | 1.124 | 3.00 | 35 |
| 0.731 | 0.711 | 0.690 | 0.669 | 1.120 | 1.076 | 1.022 | 0.966 | 0.901 | 1.206 | 1.197 | 1.181 | 1.158 | 1.125 | 3.00 | 25 |
| 0.719 | 0.699 | 0.677 | 0.657 | 1.119 | 1.074 | 1.020 | 0.964 | 0.899 | 1.203 | 1.195 | 1.179 | 1.155 | 1.122 | 3.00 | 25 |
| 0.722 | 0.702 | 0.681 | 0.661 | 1.123 | 1.079 | 1.025 | 0.969 | 0.905 | 1.200 | 1.192 | 1.176 | 1.152 | 1.119 | 3.00 | 25 |
| 0.693 | 0.673 | 0.652 | 0.631 | 1.226 | 1.184 | 1.131 | 1.073 | 1.005 | 1.236 | 1.227 | 1.212 | 1.187 | 1.154 | 3.00 | 0  |
| 0.677 | 0.658 | 0.637 | 0.617 | 1.220 | 1.179 | 1.126 | 1.068 | 1.000 | 1.230 | 1.221 | 1.206 | 1.181 | 1.148 | 3.00 | 0  |

## X-ray Crystal Structure Determination

X-ray Experimental for  $C_{37}H_{34}BNO_2$ : Crystals grew as colorless prisms by diffusion of methanol into a DCM solution. The data crystal was cut from a larger crystal and had approximate dimensions: 0.33 x 0.25 x 0.17 mm. The data were collected on a Nonius Kappa CCD diffractometer using a graphite monochromator with  $MoK\alpha$  radiation ( $\lambda = 0.71073\text{\AA}$ ). A total of 166 frames of data were collected using  $\omega$ -scans with a scan range of  $2^\circ$  and a counting time of 98 seconds per frame. The data were collected at 153 K using an Oxford Cryostream low temperature device. Data reduction were performed using DENZO-SMN.<sup>4</sup> The structure was solved by direct methods using SIR97<sup>5</sup> and refined by full-matrix least-squares on  $F^2$  with anisotropic displacement parameters for the non-H atoms using SHELXL-97.<sup>6</sup> The hydrogen atoms on carbon were calculated in ideal positions with isotropic displacement parameters set to 1.2xUeq of the attached atom (1.5xUeq for methyl hydrogen atoms). The absolute configuration was determined from the known configuration of the amine portion of the molecule. The function,  $\sum w(|F_o|^2 - |F_c|^2)^2$ , was minimized, where  $w = 1/[(\sigma(F_o))^2 + (0.0439*P)^2 + (0.2884*P)]$  and  $P = (|F_o|^2 + 2|F_c|^2)/3$ .  $R_w(F^2)$  refined to 0.0910, with  $R(F)$  equal to 0.0424 and a goodness of fit,  $S$ , = 1.07. Definitions used for calculating  $R(F)$ ,  $R_w(F^2)$  and the goodness of fit,  $S$ , are given in reference 42.<sup>7</sup> The data were corrected for secondary extinction effects. The correction takes the form:  $F_{corr} = kF_c/[1 + (2.5(7)\times 10^{-6}) * F_c^2 \lambda^3/(\sin 2\theta)]^{0.25}$  where  $k$  is the overall scale factor. Neutral atom scattering factors and values used to calculate the linear absorption coefficient are from the International Tables for X-ray Crystallography (1992).<sup>8</sup> All figures were generated using SHELXTL/PC.<sup>9</sup>

500 MHz nmr0

RSS\_CDC13  
CDC13  
TMB set to 18.6 ppm

```
exp3 s2pu1  
SAMPLE DEC. & VT  
date Jan 26 2009 dfrq 489.867  
solvent cdc13 dn H1  
file cdc13 exp 37  
ACQUISITION dof 0  
sfrq 160.376 dm nnn  
tn 511 dmm W  
at 1.202 dms 10582  
cp 13.202 dseg  
pw 51248.2 dres 1.0  
bw 28000 homo  
bs 8 temp 27.0  
tprw 53 PROCESSING  
pw 10.0 lb 10.00  
d1 2.000 wtfile  
tof 4803.4 proc ft  
nt 128 fn not used  
ct 128 math f  
alock y  
gain 40 werr wft  
fl in n  
dp in n  
hs y  
DISPLAY nn  
sp -25724.6  
wv 51248.8  
vc 3960  
sc 0  
wc 250  
hzmm 205.00  
ls 500.00  
rf1 28708.0  
rfp 2983.0  
th 30  
ins 100.000  
a1 cdc ph
```

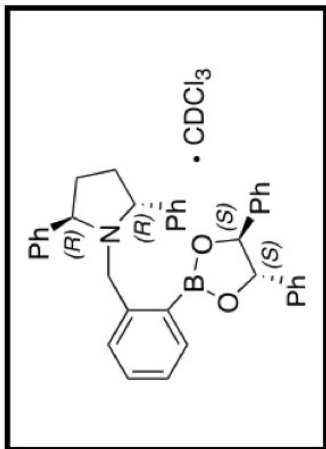

-7.314

31.295

18.600

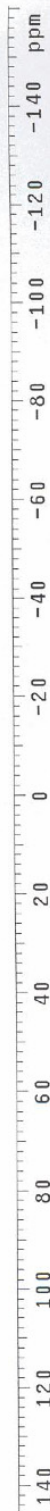

500 h.v.z nmr0

RRSS CD3OD  
CD3OD B11  
tmb set to 18.6ppm

exp7 s2pu1

DEC. & VT  
SAMPLE Jan 26 2009 dfrq 499.869  
date Jan 26 2009 dn H1  
solvent cd3od dpwr 37  
file cd3od exp 0  
ACQUISITION exp 0 nnn  
sfrq 160.377 dm 10582  
tn B11 dmm w  
at 1.282 dmf 10582  
np 131414 dseq 1.0  
sw 51248.2 pres n  
br 28008 n  
tr 8 n  
temp PROCESSING 27.0  
tpwr 53  
pw 10.0 lb 10.00  
d1 2.000 wfile 10.00  
tof 4803.4 proc ft  
nt 512 fn not used  
ct 512 math f  
alock y  
gain 40 werr wexp wft  
ll n  
ln n  
dp y  
ns  
DISPLAY mn  
SP -25603.8  
WP 51248.8  
VS 4143  
SC 0  
WC 250  
hzm 205.00  
is 500.00  
rfl 28587.2  
rff 2983.0  
th 12  
ins 100.000  
at cdc ph

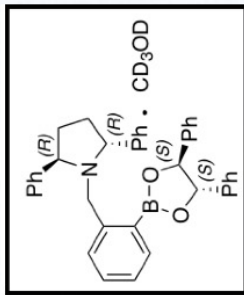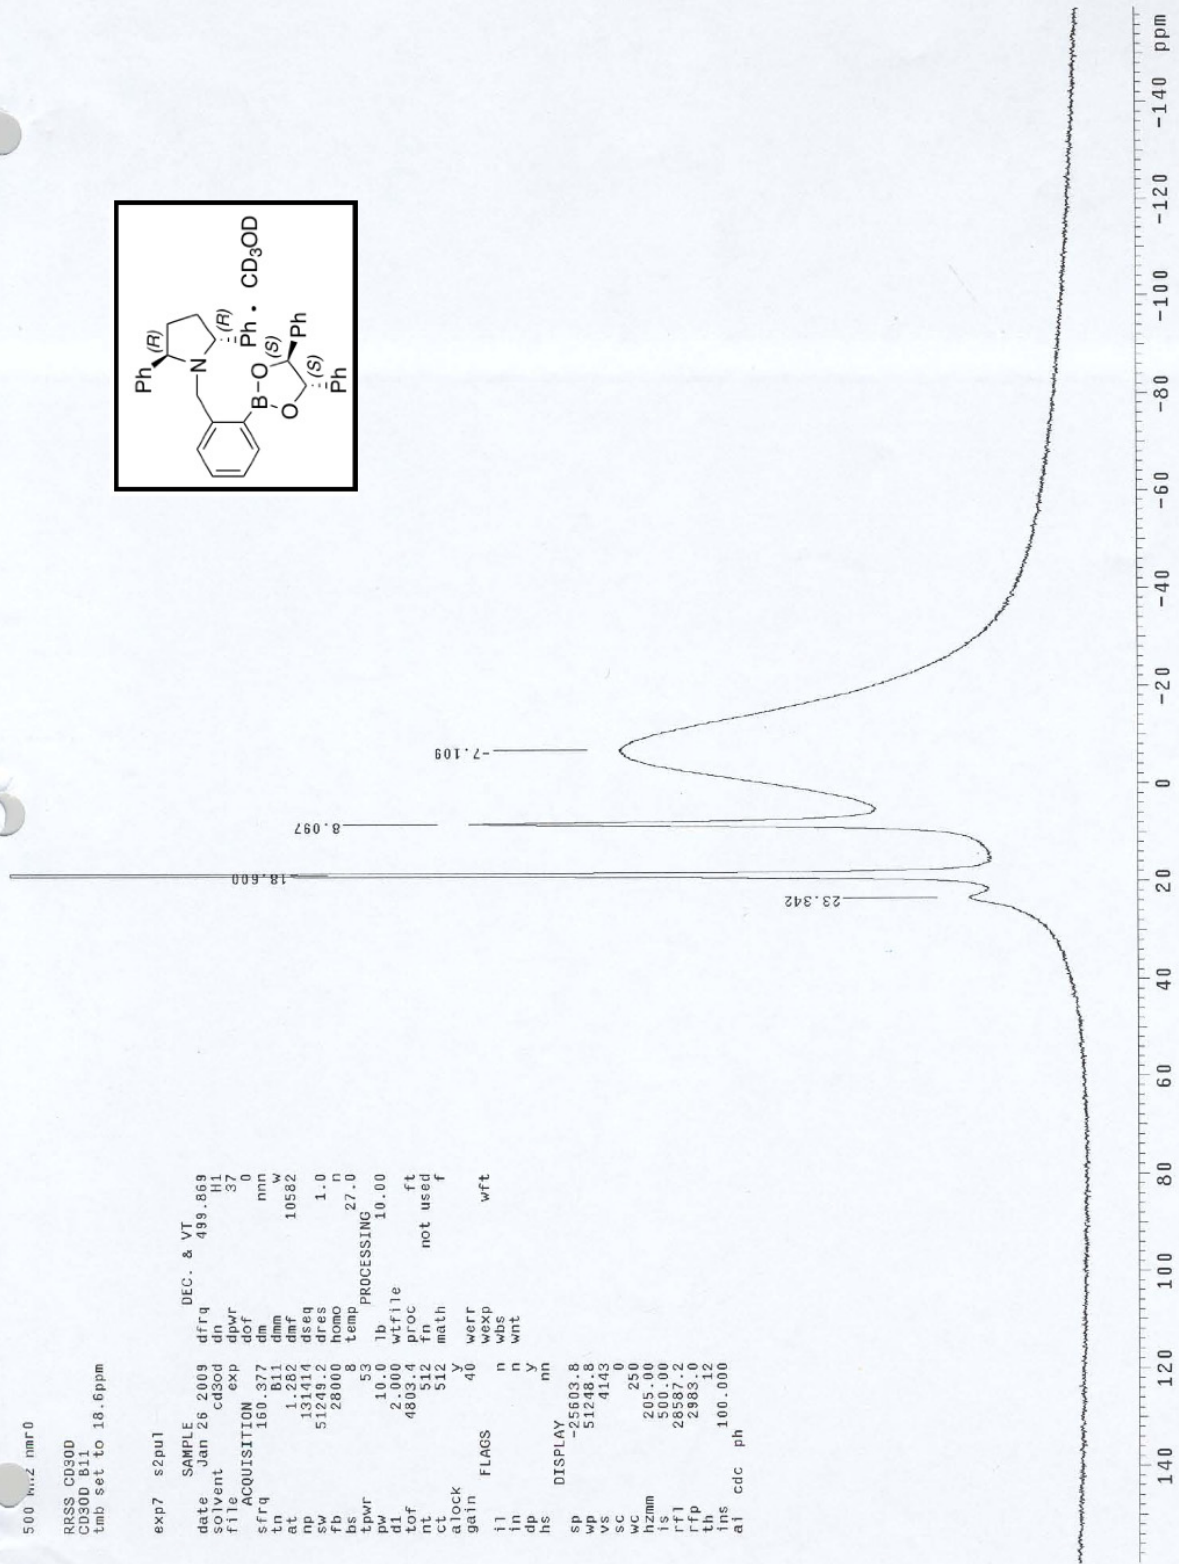

500 MHz nmr0

CDC13 B11  
tmb insert  
tmb set to 18.6ppm

exp1 s2pu1

```

SAMPLE          DEC. & VT
date            Jan 26 2009    dfrq      499.867
solvent         cdc13          dn         H1
file            exp37         dpwr       37
ACQUISITION    exp37         dof        0
sfrq           160.376       dm         mnn
tn             B11          dmm        10582
at            1.262         dmf
np            131414        dseq
sw            51249.2       dres      1.0
f0            28000.8       fomo
f1             53          temp       27.0
t1pw          10.0         lb         10.00
p1            2.000         wtfile
tof           4803.4        proc      ft
nt            256         fn         not used
ct            256         meth
alock         y           werr
gain          40          wexp
ll            n           wbs
in            n           wnt
hs            y           rfn
DISPLAY        nm
sp            -25721.1
wp            51248.8
vs            3564
sc            250
wC            250
H2mm          205.00
hs            500.00
rfl           28704.5
rff           2883.0
th            21
ins           100.000
at            cdc ph

```

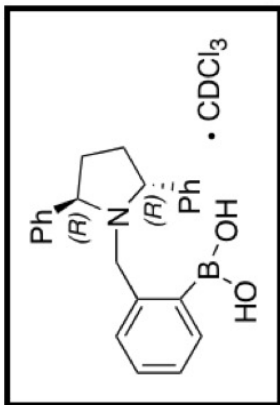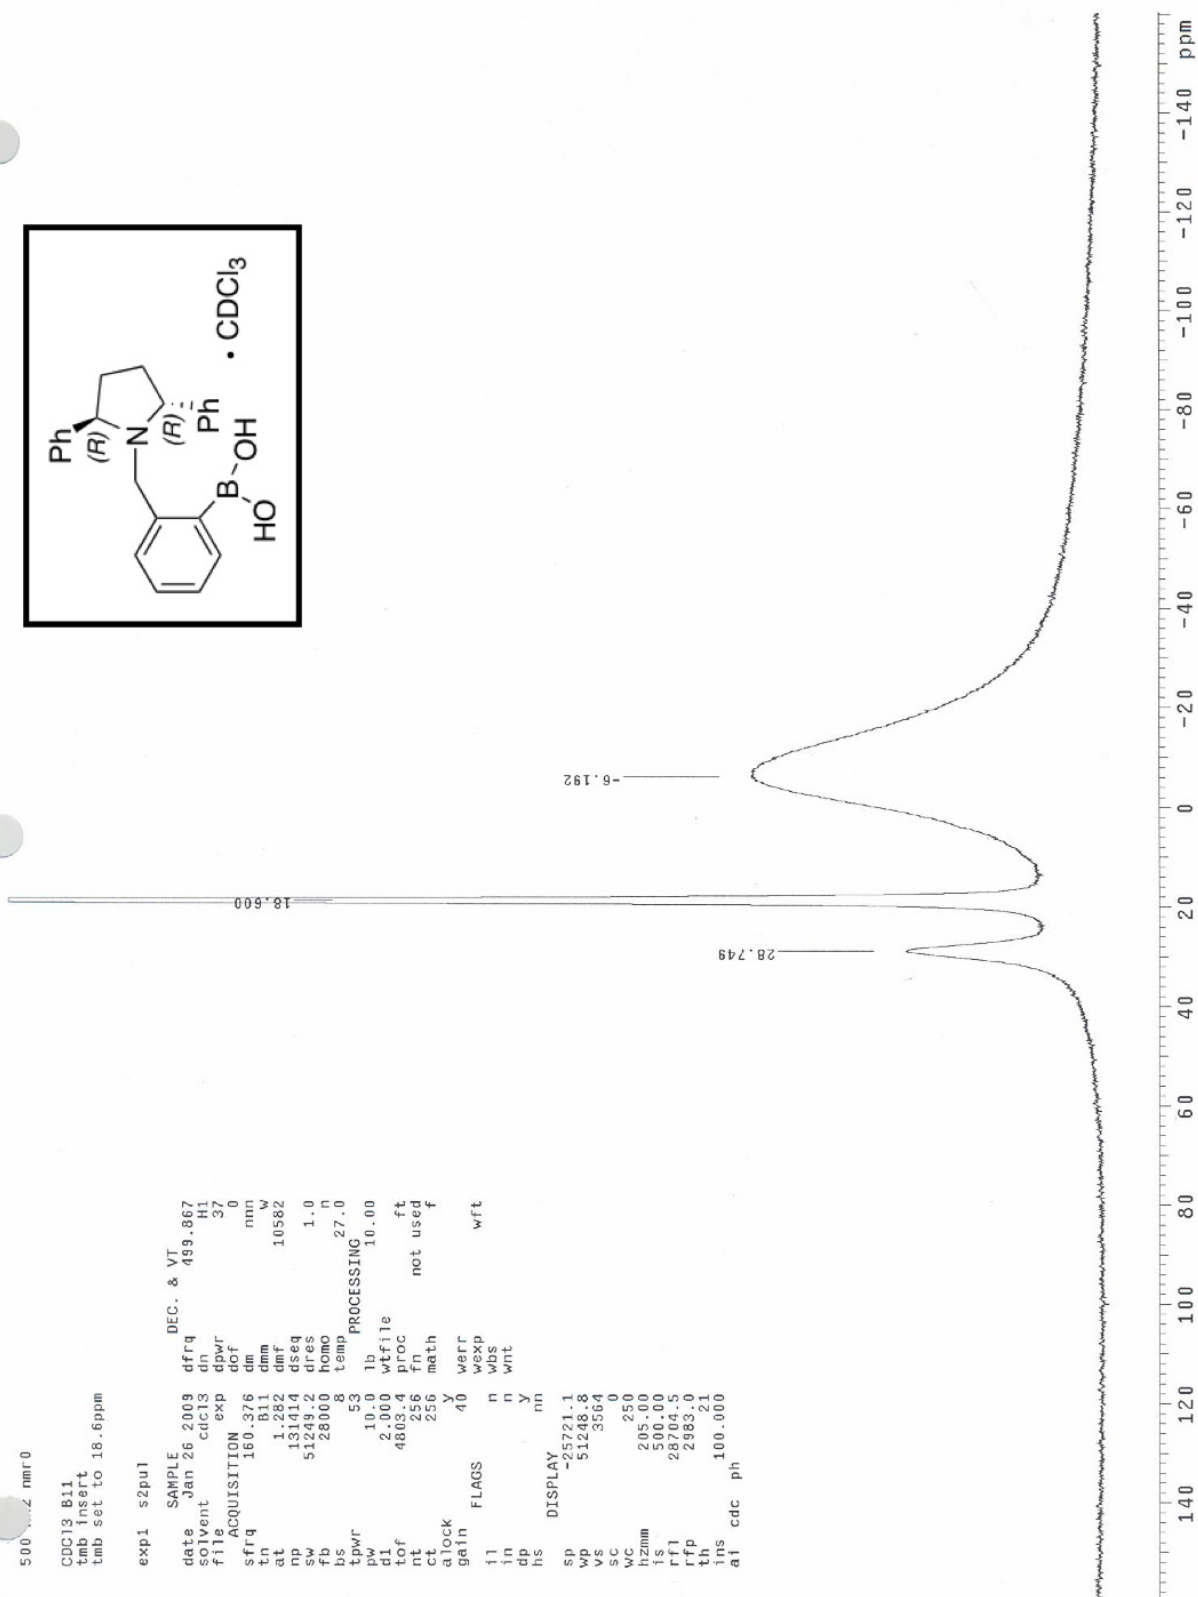

500 MHz nmr0

CD30D 811  
tmb insert

```
exp2 s2pu1
SAMPLE
date Jan 26 2009
solvent cd30d
file cd30d
ACQUISITION
sfrq 160.377
at 1.282
np 131414
sw 51249.2
fb 28000
tpwr 53
pw 10.0
d1 2.000
tof 4803.4
nt 256
ct 256
alock
gain
flags
il n
in n
dp n
hs y
sp -25602.0
wp 51248.8
vs 6467
sc 0
wc 250
hzmm 205.00
rf 500.00
rfi 25602.0
rfp 0
th 28
ins 100.000
ai cdc ph
```

DEC. & VT 489.869  
H1 37  
S7 0  
nnn w  
dm 10582  
dmm 1.0  
dmf dseq  
dres 1.0  
tomo n  
temp 27.0  
PROCESSING 10.00  
wfile ft  
proc not used  
fn f  
math f  
werr y  
wexp wft  
wbs n  
wnt y

DISPLAY  
-25602.0  
51248.8  
6467  
0  
205.00  
500.00  
25602.0  
0  
28  
100.000

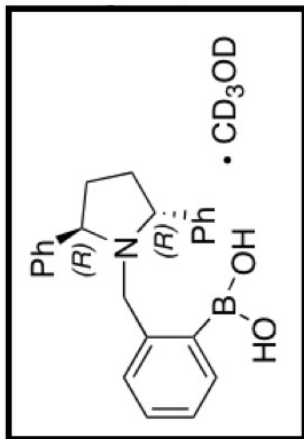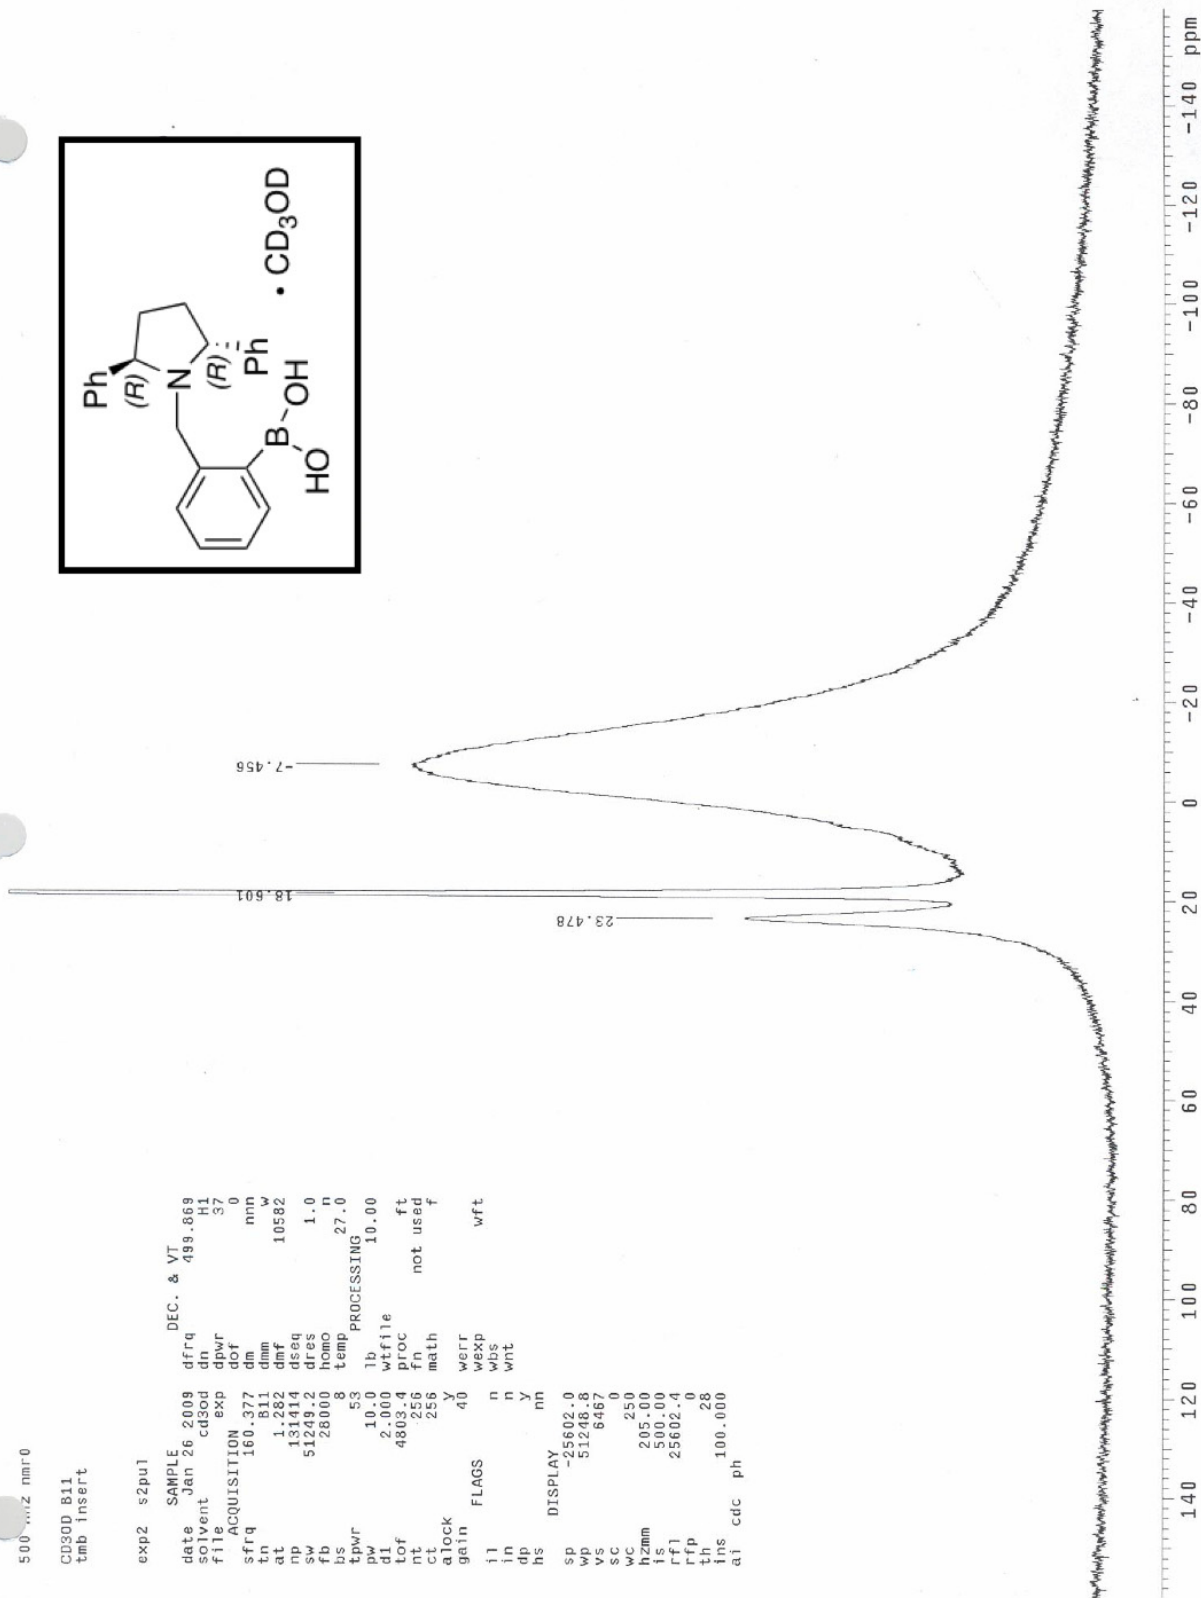



## REFERENCES:

- (1) Zhu, L.; Anslyn, E. V. *J. Am. Chem. Soc.* **2004**, *126*, 3676-3677.
- (2) Piatek, A. M.; Bomble, Y. J.; Wiskur, S. L.; Anslyn, E. V. *J. Am. Chem. Soc.* **2004**, *126*, 6072-6077.
- (3) Kelly, A. M.; Perez-Fuertes, Y.; Arimori, S.; Bull, S. D.; James, T. D. *Org. Lett.* **2006**, *8*, 1971-1974.
- (4) Otwinowski, Z.; Minor, W.; Charles W. Carter, Jr. In *Methods in Enzymology*; Academic Press: 1997; Vol. Volume 276, p 307-326.
- (5) Altomare, A.; Burla, M. C.; Camalli, M.; Cascarano, G. L.; Giacovazzo, C.; Guagliardi, A.; Moliterni, A. G. G.; Polidori, G.; Spagnac, R. *J. Appl. Cryst.* **1999**, *32*, 115-119.
- (6) Sheldrick, G. M. University of Gottingen, Germany, 1994.
- (7)  $R_w(F^2) = \{\sum w(|F_o|^2 - |F_c|^2)^2 / \sum w(|F_o|^4)\}^{1/2}$  where w is the weight given each reflection.  $R(F) = \sum(|F_o| - |F_c|) / \sum |F_o|$  for reflections with  $F_o > 4(\sigma(F_o))$ .  $S = [\sum w(|F_o|^2 - |F_c|^2)^2 / (n - p)]^{1/2}$ , where n is the number of reflections and p is the number of refined parameter.
- (8) *International Tables for X-ray Crystallography*; Wilson, A. J. C., Ed.; Kluwer Academic Press: Boston, 1992.
- (9) Sheldrick, G. M.; Siemens Analytical X-ray Instruments, Inc.: Madison, Wisconsin, USA, 1994.
